# Supplementary material for: The Challenges of Transition From Donor-Funded Programs: Results From a Theory-Driven Multi-Country Comparative Case Study of Programs in Eastern Europe and Central Asia Supported by the Global Fund
Source: PubMed Central journal article supplement (PMC6641812; doi:10.9745/ghsp-d-18-00425), 2019-06-24
Supplement: 18-00425-Sulaberidze-SupplementTable1.pdf [file 18-00425-Sulaberidze-SupplementTable1.pdf]

**SUPPLEMENT TABLE 1.** Number of Country Representatives Participating in Transition Preparedness Assessment

| <b>Countries</b> | <b>State Institutions and National HIV and TB Program Representatives</b> | <b>Donors and Partners</b> | <b>Local CSO, Professional Associations</b> |
|------------------|---------------------------------------------------------------------------|----------------------------|---------------------------------------------|
| Armenia          | 12                                                                        | 5                          | 4                                           |
| Belarus          | 18                                                                        | 3                          | 3                                           |
| Bulgaria         | 21                                                                        | 2                          | 11                                          |
| Georgia          | 17                                                                        | 6                          | 14                                          |
| Kosovo           | 13                                                                        | 2                          | 6                                           |
| Kyrgyzstan       | 12                                                                        | 5                          | 2                                           |
| Moldova          | 16                                                                        | 6                          | 5                                           |
| Turkmenistan     | 6                                                                         | 5                          | 12                                          |
| Ukraine          | 15                                                                        | 12                         | 7                                           |
| Uzbekistan       | 14                                                                        | 4                          | 6                                           |

Abbreviations: CSO, civil society organization; TB, tuberculosis.
